# Supplementary material for: Cationic 2,2′-bipyridine complexes of germanium(ii) and tin(ii)
Source: Royal Society of Chemistry journal article supplement (doi:10.1039/c7dt02148h), 2017-01-01
Supplement: c7dt02148h1.pdf [file c7dt02148h1.pdf]

## Supplementary Information

### Cationic 2,2'-bipyridine Complexes of Germanium(II) and Tin(II)

*Paul A. Gray,<sup>a</sup> Katherine D. Krause,<sup>a</sup> Neil Burford,<sup>\*a</sup> and Brian O. Patrick<sup>b</sup>*

<sup>a</sup>Department of Chemistry, University of Victoria, P.O Box 3065, Stn. CSC,

Victoria, Canada

E-mail: [nburford@uvic.ca](mailto:nburford@uvic.ca)

<sup>b</sup>Department of Chemistry, University of British Columbia, Vancouver, BC, V6T

1Z1, Canada

## Table of Contents

|                                                    |     |
|----------------------------------------------------|-----|
| Experimental Details .....                         | S2  |
| Crystallographic Details .....                     | S7  |
| Cartesian Coordinates of Optimized Geometries..... | S11 |
| References .....                                   | S12 |

## Experimental Details

All reactions were carried out in a MBraun glove box under an N<sub>2</sub> atmosphere. Solvents were dried over CaH<sub>2</sub> or Na/Benzophenone and stored over molecular sieves (3 Å: MeCN, 4 Å: Et<sub>2</sub>O, CH<sub>2</sub>Cl<sub>2</sub>, DMSO) unless otherwise specified. Anhydrous MeCN-d<sub>3</sub> was purchased from Aldrich and stored over molecular sieves for 48 hours prior to use. GeCl<sub>2</sub>·Dioxane and SnCl<sub>2</sub> were purchased from Sigma-Aldrich and used as received. 2,2'-bipyridine was purchased from Sigma-Aldrich and recrystallized from CH<sub>2</sub>Cl<sub>2</sub> prior to use. Trimethylsilyl trifluoromethanesulfonate (TMSOTf) was purchased from Sigma-Aldrich and distilled prior to use.

Solution <sup>1</sup>H, <sup>13</sup>C, <sup>19</sup>F and <sup>119</sup>Sn NMR spectra were collected at room temperature on a Bruker AVANCE 300 (7.02 T) or Bruker Avance 360 (8.4 T) NMR spectrometers, with relative frequencies and temperatures explicitly given for each compound. Chemical shifts are reported in ppm relative to trace protonated solvent (<sup>1</sup>H), perdeuterated solvent (<sup>13</sup>C), or an external reference standard (<sup>119</sup>Sn, Sn(CH<sub>4</sub>)<sub>4</sub>; <sup>19</sup>F, CFC<sub>3</sub>). NMR spectra of reaction mixtures were obtained by transferring an aliquot of the bulk solution to a 5 mm NMR tube, which was then capped and sealed with Teflon tape.

Infrared spectra were collected on samples using Nujol mull using a Perkin-Elmer Spectru, FT-IR spectrometer and peaks are reported in wavenumbers (cm<sup>-1</sup>). Melting points were obtained on samples sealed in glass capillaries under dry nitrogen using an Electrothermal apparatus.

Elemental analyses were performed on selected compounds by Canadian Microanalytical Services Ltd., Delta, British Columbia, Canada.

Unless otherwise stated, crystals for single crystal X-ray diffraction studies were obtained by vapor diffusion at room temperature or from slow diffusion of a layered non-solvent into a saturated solution of the compound at -35°C. Single crystal X-ray diffraction data were collected

on a Bruker D8 Apex II diffractometer with graphite-monochromated Mo K $\alpha$  radiation ( $\lambda = 0.71073 \text{ \AA}$ ) at room temperature. Data were collected and integrated using the Bruker SAINT software package.<sup>1</sup> Absorption corrections were performed using the multi-scan technique (SADABS).<sup>2</sup> The structures were solved by intrinsic phasing using SHELXT<sup>3</sup> and refined using all reflections with SHELXL.<sup>4</sup> All non hydrogen atoms were refined anisotropically. Structures were solved and refined using Olex2 package.<sup>5</sup> Crystallographic information files have been deposited in the Cambridge Structural Database (CSD) with numbers 1546731, 1546732, and 1546733 for [(bipy)GeCl][OTf], [(bipy)<sub>2</sub>Ge][OTf]<sub>2</sub>, and [(bipy)<sub>2</sub>Sn][OTf]<sub>2</sub> respectively. Quantum chemical calculations were carried out using Gaussian 09.<sup>6</sup>

**Synthesis of [(bipy)GeCl][OTf] – Method A:** GeCl<sub>2</sub>·dioxane (2 mmol, 0.463g), TMSOTf (2 mmol, 362  $\mu$ L) and 2,2'-bipyridine (2 mmol, 0.312 g) were combined in 5 mL CH<sub>3</sub>CN to obtain a colourless, cloudy mixture which was stirred for 2 hours. Removal of the solvent under reduced pressure gave the product as a fine colourless powder. The powder was washed with CH<sub>2</sub>Cl<sub>2</sub> and Et<sub>2</sub>O and re-dissolved in a minimum volume of CH<sub>3</sub>CN. The resulting solution was filtered, layered with Et<sub>2</sub>O, and placed in a freezer at -35°C for 48 hours to obtain colourless crystalline material.

**Method B:** GeCl<sub>2</sub>·dioxane (2 mmol, 0.463g) and 2,2'-bipyridine (2 mmol, 0.312 g) were combined in 5 mL CH<sub>2</sub>Cl<sub>2</sub> to immediately give a bright yellow suspension, which was stirred for 1 hour. Removal of the solvent under reduced pressure gave a dark yellow powder as the previously characterized neutral adduct. The powder was subsequently re-suspended in CH<sub>3</sub>CN, and to this mixture was added TMSOTf (2 mmol, 362  $\mu$ L), giving a slightly cloudy, colourless mixture after 2 hours. Removal of the solvent gave the title product as a colourless powder. The powder was washed with CH<sub>2</sub>Cl<sub>2</sub> and Et<sub>2</sub>O and re-dissolved in a minimum volume of CH<sub>3</sub>CN.

The resulting solution was filtered, layered with Et<sub>2</sub>O, and placed in a freezer at -35°C for 48 hours to obtain colourless crystalline material.

Yield: 0.726 g (88%); <sup>1</sup>H NMR, ppm (CD<sub>3</sub>CN, 298K, 300.1 MHz) δ = 8.05 (ddd, *J* = 7.6, 5.6, 1.2 Hz, 2H), 8.55 (td, *J* = 7.6, 1.5 Hz, 2H), 8.66 (*pseudo dt*, *J* = 8.1, 1.1 Hz, 2H), 9.12 (ddd, *J* = 5.6, 1.5, 0.9 Hz, 2H); <sup>13</sup>C{<sup>1</sup>H} NMR, ppm (CD<sub>3</sub>CN, 298K, 75.5 MHz): δ = 124.3 (s), 128.9 (s), 144.8 (s), 146.0 (s), 148.8 (s); <sup>19</sup>F{<sup>1</sup>H} NMR, ppm (CD<sub>3</sub>CN, 298K, 282.5 MHz) δ = -79.2 (s); Melting point: 205-206°C; IR, Nujol mull, cm<sup>-1</sup>: 3118, 2921, 2853, 2325, 1621, 1605, 1581, 1576, 1506, 1480, 1466, 1453, 1441, 1377, 1326, 1291, 1276, 1266, 1248, 1219, 1185, 1150, 1109, 1058, 1049, 1039, 1024, 1019, 984, 921, 776, 770, 726, 658, 649, 635, 576, 572;

**Synthesis of [(bipy)<sub>2</sub>Ge][OTf]<sub>2</sub> – Method A:** GeCl<sub>2</sub>·dioxane (2 mmol, 0.463g), TMSOTf (4 mmol, 724 μL) and 2,2'-bipyridine (4 mmol, 0.624 g) were combined in 5 mL CH<sub>3</sub>CN to obtain a clear, yellow solution which was stirred for 2 hours. Removal of the solvent under reduced pressure gave a fine yellow powder. The powder was washed with CH<sub>2</sub>Cl<sub>2</sub> and Et<sub>2</sub>O and re-dissolved in a minimum volume of CH<sub>3</sub>CN. The resulting solution was filtered, layered with Et<sub>2</sub>O, and placed in a freezer at -35°C for 48 hours to obtain yellow crystalline material.

**Method B:** GeCl<sub>2</sub>·dioxane (2 mmol, 0.463g) and 2,2'-bipyridine (2 mmol, 0.312 g) were combined in 5 mL CH<sub>2</sub>Cl<sub>2</sub> to immediately give a bright yellow suspension, which was stirred for 1 hour. Removal of the solvent under reduced pressure gave a dark yellow powder as the previously characterized neutral adduct. The powder was subsequently re-suspended in CH<sub>3</sub>CN, and to this mixture was added TMSOTf (4 mmol, 724 μL), giving first a cloudy, colourless mixture, turning to a clear, yellow solution which was stirred for 2 hours. Removal of the solvent under reduced pressure gave a fine yellow powder. The powder was washed with CH<sub>2</sub>Cl<sub>2</sub> and Et<sub>2</sub>O and re-dissolved in a minimum volume of CH<sub>3</sub>CN. The resulting solution was filtered,

layered with Et<sub>2</sub>O, and placed in a freezer at -35°C for 48 hours to obtain yellow crystalline material.

Yield: 1.175 g (86%); <sup>1</sup>H NMR, ppm (CD<sub>3</sub>CN, 298K, 300.1 MHz) δ = 7.89 (t, broad, *J* = 6.5 Hz, 2H), 8.48 (td, broad, *J* = 7.9, 1.2 Hz, 2H), 8.69 (d, broad, *J* = 8.2 Hz, 2H), 8.86 (d, broad, *J* = 4.9 Hz, 2H); <sup>13</sup>C{<sup>1</sup>H} NMR, ppm (CD<sub>3</sub>CN, 298K, 75.5 MHz): δ = 124.5 (s), 128.5 (s), 143.9 (s), 147.4 (s), 159.1 (s); <sup>19</sup>F{<sup>1</sup>H} NMR, ppm (CD<sub>3</sub>CN, 298K, 282.5 MHz) δ = -79.3 (s); Melting point: 195-196°C; (dec) IR, Nujol mull, cm<sup>-1</sup>: 3091, 2953, 2921, 2853, 2342, 1610, 1604, 1594, 1583, 1562, 1509, 1462, 1446, 1377, 1317, 1281, 1254, 1234, 1224, 1191, 1152, 1112, 1099, 1088, 1031, 1021, 971, 943, 819, 772, 757, 734, 723, 654, 648, 637, 630, 612, 573; Elemental Analysis including 0.75 molecules of CH<sub>2</sub>Cl<sub>2</sub> (Calc/Exp): C (36.59/36.52); H (2.36/2.13); N (7.50/7.53) for crystalline sample with yield of 0.093g

**Synthesis of [(bipy)SnCl][OTf] – Method A:** SnCl<sub>2</sub> (2 mmol, 0.379g), TMSOTf (2 mmol, 362 μL) and 2,2'-bipyridine (2 mmol, 0.312 g) were combined in 5 mL CH<sub>3</sub>CN to obtain a colourless suspension which was stirred for 2 hours. Removal of the solvent under reduced pressure gave the product as a fine colourless powder. The powder was washed with CH<sub>2</sub>Cl<sub>2</sub> and Et<sub>2</sub>O and pumped dry. Due to its low solubility in CH<sub>2</sub>Cl<sub>2</sub> and CH<sub>3</sub>CN, crystalline material suitable for x-ray analysis could not be isolated. However, the analysis of the bulk material was consistent with the title compound.

**Method B:** SnCl<sub>2</sub> (2 mmol, 0.379g) and 2,2'-bipyridine (2 mmol, 0.312 g) were combined in 5 mL CH<sub>2</sub>Cl<sub>2</sub> to immediately give a bright yellow suspension, which was stirred for 1 hour. Removal of the solvent under reduced pressure gave a dark yellow powder as the previously characterized neutral adduct. The powder was subsequently re-suspended in CH<sub>3</sub>CN, and to this mixture was added TMSOTf (2 mmol, 362 μL), giving a colourless suspension after 2 hours.

Removal of the solvent gave the title product as a colourless powder. The powder was washed with CH<sub>2</sub>Cl<sub>2</sub> and Et<sub>2</sub>O and pumped dry. Due to its low solubility in CH<sub>2</sub>Cl<sub>2</sub> and CH<sub>3</sub>CN, crystalline material suitable for x-ray analysis could not be isolated. However, the analysis of the bulk material was consistent with the title compound. Yield: 0.827 g (90%); <sup>1</sup>H NMR, ppm (CD<sub>3</sub>CN/DMSO, 298K, 300.1 MHz) δ = 7.63 (ddd, *J* = 7.6, 5.3, 1.2 Hz, 2H), 8.11 (td, *J* = 7.8, 1.8 Hz, 2H), 8.45 (*pseudo dt*, *J* = 7.9, 1.1 Hz, 2H), 8.91 (ddd, *J* = 5.3, 1.8, 0.9 Hz, 2H); <sup>13</sup>C{<sup>1</sup>H} NMR, ppm (CD<sub>3</sub>CN/DMSO, 298K, 75.5 MHz): δ = 123.3 (s), 126.8 (s), 141.0 (s), 149.3 (s), 153.6 (s); <sup>19</sup>F{<sup>1</sup>H} NMR, ppm (CD<sub>3</sub>CN, 298K, 282.5 MHz) δ = -79.2 (s); <sup>119</sup>Sn{<sup>1</sup>H} NMR, ppm, (CD<sub>3</sub>CN/DMSO, 298K, 134.3 MHz) δ = -577.0 (s); Melting point: 211-212°C; IR, Nujol mull, cm<sup>-1</sup>: 3113, 2921, 2853, 2724, 2364, 1610, 1601, 1576, 1567, 1502, 1463, 1448, 1377, 1324, 1292, 1271, 1250, 1219, 1188, 1160, 1151, 1114, 1108, 1074, 1064, 1044, 1019, 979, 909, 771, 767, 757, 730, 671, 654, 638, 633, 576, 572; Elemental Analysis (Calc/Exp): C (28.76/28.56); H (1.76/1.68); N (6.10/5.98).

**Synthesis of [(bipy)<sub>2</sub>Sn][OTf]<sub>2</sub>] – Method A:** SnCl<sub>2</sub> (2 mmol, 0.379g), TMSOTf (4 mmol, 724 μL) and 2,2'-bipyridine (4 mmol, 0.624 g) were combined in 5 mL CH<sub>3</sub>CN to obtain a clear, yellow solution which was stirred for 2 hours. Removal of the solvent under reduced pressure gave a fine yellow powder. The powder was washed with CH<sub>2</sub>Cl<sub>2</sub> and Et<sub>2</sub>O and re-dissolved in a minimum volume of CH<sub>3</sub>CN. The resulting solution was filtered, layered with Et<sub>2</sub>O, and placed in a freezer at -35°C for 48 hours to obtain yellow crystalline material.

**Method B:** SnCl<sub>2</sub> (2 mmol, 0.379g) and 2,2'-bipyridine (2 mmol, 0.312 g) were combined in 5 mL CH<sub>2</sub>Cl<sub>2</sub> to immediately give a bright yellow suspension, which was stirred for 1 hour. Removal of the solvent under reduced pressure gave a dark yellow powder as the previously characterized neutral adduct. The powder was subsequently re-suspended in CH<sub>3</sub>CN, and to this

mixture was added TMSOTf (4 mmol, 724  $\mu$ L), giving first a colourless suspension, turning to a clear, yellow solution which was stirred for 2 hours. Removal of the solvent under reduced pressure gave a fine yellow powder. The powder was washed with  $\text{CH}_2\text{Cl}_2$  and  $\text{Et}_2\text{O}$  and re-dissolved in a minimum volume of  $\text{CH}_3\text{CN}$ . The resulting solution was filtered, layered with  $\text{Et}_2\text{O}$ , and placed in a freezer at  $-35^\circ\text{C}$  for 48 hours to obtain yellow crystalline material.

Yield: 1.283 g (88%);  $^1\text{H}$  NMR, ppm ( $\text{CD}_3\text{CN}$ , 298K, 300.1 MHz)  $\delta$  = 7.79 (ddd,  $J$  = 7.8, 5.3, 1.2 Hz, 2H), 8.33 (td,  $J$  = 7.9, 1.6 Hz, 2H), 8.51 (*pseudo dt*,  $J$  = 8.1, 1.0 Hz, 2H), 8.74 (ddd,  $J$  = 5.3, 1.8, 0.9 Hz, 2H);  $^{13}\text{C}\{^1\text{H}\}$  NMR, ppm ( $\text{CD}_3\text{CN}$ , 298K, 75.5 MHz):  $\delta$  = 125.3 (s), 129.0 (s), 143.7 (s), 149.3 (s), 151.5 (s);  $^{19}\text{F}\{^1\text{H}\}$  NMR, ppm ( $\text{CD}_3\text{CN}$ , 298K, 282.5 MHz)  $\delta$  = -79.5 (s);  $^{119}\text{Sn}\{^1\text{H}\}$  NMR, ppm, ( $\text{CD}_3\text{CN}$ , 298K, 134.3 MHz)  $\delta$  = -728.6 (s); Melting point  $192^\circ\text{C}$  (dec): IR, Nujol mull,  $\text{cm}^{-1}$ : 3068, 2924, 2853, 2725, 2258, 1605, 1598, 1578, 1567, 1495, 1467, 1445, 1377, 1321, 1276, 1296, 1276, 1238, 1222, 1158, 1135, 1025, 1013, 1004, 908, 808, 756, 748, 732, 653, 634, 627, 572; Elemental Analysis (Calc/Exp): C (36.24/35.89); H (2.21/2.07); N (7.68/7.51) for crystalline sample with yield of 0.113g.

### Crystallographic Details

Data was collected on a Bruker X8 Apex II diffractometer with graphite-monocromated Mo  $\text{K}\alpha$  radiation ( $\lambda$  = 0.71073  $\text{\AA}$ ) at room temperature. Data were collected and integrated using the Bruker SAINT software package.<sup>1</sup> Absorption corrections were performed using the multi-scan technique (SADABS).<sup>2</sup> The structures were solved by intrinsic phasing using SHELXT<sup>3</sup> and refined using all reflections with SHELXL.<sup>4</sup> All non hydrogen atoms were refined anisotropically. Structures were solved and refined using Olex2 package.<sup>5</sup>

**Table S1:** Crystal data and refinement details for [GeCl(bipy)][OTf]

| <b>Compound</b>                             | <b>[GeCl(bipy)][OTf]</b>                                                          |
|---------------------------------------------|-----------------------------------------------------------------------------------|
| Empirical formula                           | C <sub>11</sub> H <sub>8</sub> ClF <sub>3</sub> GeN <sub>2</sub> O <sub>3</sub> S |
| CCDC number                                 | 1546731                                                                           |
| Formula weight                              | 413.29                                                                            |
| Temperature (K)                             | 296.15                                                                            |
| Crystal system                              | monoclinic                                                                        |
| Space group                                 | P2 <sub>1</sub> /n                                                                |
| a (Å)                                       | 7.5779(7)                                                                         |
| b (Å)                                       | 16.7991(14)                                                                       |
| c (Å)                                       | 11.0317(10)                                                                       |
| α (°)                                       | 90                                                                                |
| β (°)                                       | 93.030(3)                                                                         |
| γ (°)                                       | 90                                                                                |
| Volume (Å <sup>3</sup> )                    | 1402.4(2)                                                                         |
| Z                                           | 4                                                                                 |
| ρ <sub>calc</sub> (g/cm <sup>3</sup> )      | 1.957                                                                             |
| μ (mm <sup>-1</sup> )                       | 2.571                                                                             |
| F(000)                                      | 816.0                                                                             |
| Crystal size (mm <sup>3</sup> )             | 0.21 × 0.16 × 0.12                                                                |
| Radiation                                   | MoKα (λ = 0.71073)                                                                |
| 2θ range for data collection/°              | 4.422 to 60.082                                                                   |
| Index ranges                                | -10 ≤ h ≤ 10, -23 ≤ k ≤ 21, -15 ≤ l ≤ 14                                          |
| Reflections collected                       | 14581                                                                             |
| Independent reflections                     | 4100 [R <sub>int</sub> = 0.0504, R <sub>sigma</sub> = 0.0503]                     |
| Structure solution method                   | intrinsic phasing                                                                 |
| Refinement method                           | full-matrix least-squares on F <sup>2</sup> (SHELXL-03)                           |
| Absorption correction                       | multi-scan (SADABS)                                                               |
| Data/restraints/parameters                  | 4100/0/199                                                                        |
| Goodness-of-fit on F <sup>2</sup>           | 1.047                                                                             |
| Final R indexes [I ≥ 2σ (I)]                | R <sub>1</sub> = 0.0320, wR <sub>2</sub> = 0.0715                                 |
| Final R indexes [all data]                  | R <sub>1</sub> = 0.0441, wR <sub>2</sub> = 0.0759                                 |
| Largest diff. peak/hole / e Å <sup>-3</sup> | 0.55/-0.35                                                                        |

**Table S2:** Crystal data and refinement details for **[Ge(bipy)<sub>2</sub>][OTf]<sub>2</sub>**

| <b>Compound</b>                             | <b>[Ge(bipy)<sub>2</sub>][OTf]<sub>2</sub></b>                                                |
|---------------------------------------------|-----------------------------------------------------------------------------------------------|
| Empirical formula                           | C <sub>24</sub> H <sub>19</sub> F <sub>6</sub> GeN <sub>5</sub> O <sub>6</sub> S <sub>2</sub> |
| CCDC number                                 | 1546732                                                                                       |
| Formula weight                              | 724.15                                                                                        |
| Temperature (K)                             | 273.15                                                                                        |
| Crystal system                              | triclinic                                                                                     |
| Space group                                 | P-1                                                                                           |
| a (Å)                                       | 9.6827(5)                                                                                     |
| b (Å)                                       | 12.2345(7)                                                                                    |
| c (Å)                                       | 13.5264(8)                                                                                    |
| α (°)                                       | 105.9780(10)                                                                                  |
| β (°)                                       | 96.5280(10)                                                                                   |
| γ (°)                                       | 109.6380(10)                                                                                  |
| Volume (Å <sup>3</sup> )                    | 1412.75(14)                                                                                   |
| Z                                           | 2                                                                                             |
| ρ <sub>calc</sub> (g/cm <sup>3</sup> )      | 1.702                                                                                         |
| μ (mm <sup>-1</sup> )                       | 1.321                                                                                         |
| F(000)                                      | 728.0                                                                                         |
| Crystal size (mm <sup>3</sup> )             | 0.22 × 0.16 × 0.14                                                                            |
| Radiation                                   | MoKα (λ = 0.71073)                                                                            |
| 2θ range for data collection/°              | 3.216 to 60.156                                                                               |
| Index ranges                                | -13 ≤ h ≤ 13, -17 ≤ k ≤ 17, -19 ≤ l ≤ 19                                                      |
| Reflections collected                       | 30486                                                                                         |
| Independent reflections                     | 8260 [R <sub>int</sub> = 0.0265, R <sub>sigma</sub> = 0.0254]                                 |
| Structure solution method                   | intrinsic phasing                                                                             |
| Refinement method                           | full-matrix least-squares on F <sup>2</sup> (SHELXL-03)                                       |
| Absorption correction                       | multi-scan (SADABS)                                                                           |
| Data/restraints/parameters                  | 8260/0/398                                                                                    |
| Goodness-of-fit on F <sup>2</sup>           | 1.044                                                                                         |
| Final R indexes [I ≥ 2σ (I)]                | R <sub>1</sub> = 0.0244, wR <sub>2</sub> = 0.0613                                             |
| Final R indexes [all data]                  | R <sub>1</sub> = 0.0280, wR <sub>2</sub> = 0.0629                                             |
| Largest diff. peak/hole / e Å <sup>-3</sup> | 0.47/-0.45                                                                                    |

**Table S3:** Crystal data and refinement details for [Sn(bipy)<sub>2</sub>][OTf]<sub>2</sub>

| Compound                                    | [Sn(bipy) <sub>2</sub> ][OTf] <sub>2</sub>                                                                           |
|---------------------------------------------|----------------------------------------------------------------------------------------------------------------------|
| Empirical formula                           | C <sub>25.3</sub> H <sub>21.5</sub> Cl <sub>2</sub> F <sub>6</sub> N <sub>5.2</sub> O <sub>6</sub> S <sub>2</sub> Sn |
| CCDC number                                 | 1546733                                                                                                              |
| Formula weight                              | 862.12                                                                                                               |
| Temperature (K)                             | 296.15                                                                                                               |
| Crystal system                              | monoclinic                                                                                                           |
| Space group                                 | P2 <sub>1</sub> /n                                                                                                   |
| a (Å)                                       | 9.3539(4)                                                                                                            |
| b (Å)                                       | 19.7280(9)                                                                                                           |
| c (Å)                                       | 17.8782(8)                                                                                                           |
| α (°)                                       | 90                                                                                                                   |
| β (°)                                       | 103.627(2)                                                                                                           |
| γ (°)                                       | 90                                                                                                                   |
| Volume (Å <sup>3</sup> )                    | 3206.3(2)                                                                                                            |
| Z                                           | 4                                                                                                                    |
| ρ <sub>calc</sub> (g/cm <sup>3</sup> )      | 1.786                                                                                                                |
| μ (mm <sup>-1</sup> )                       | 1.178                                                                                                                |
| F(000)                                      | 1711.0                                                                                                               |
| Crystal size (mm <sup>3</sup> )             | 0.41 × 0.38 × 0.14                                                                                                   |
| Radiation                                   | MoKα (λ = 0.71073)                                                                                                   |
| 2θ range for data collection/°              | 3.124 to 60.206                                                                                                      |
| Index ranges                                | -13 ≤ h ≤ 13, -27 ≤ k ≤ 24, -25 ≤ l ≤ 24                                                                             |
| Reflections collected                       | 36861                                                                                                                |
| Independent reflections                     | 9384 [R <sub>int</sub> = 0.0361, R <sub>sigma</sub> = 0.0376]                                                        |
| Structure solution method                   | intrinsic phasing                                                                                                    |
| Refinement method                           | full-matrix least-squares on F <sup>2</sup> (SHELXL-03)                                                              |
| Absorption correction                       | multi-scan (SADABS)                                                                                                  |
| Data/restraints/parameters                  | 9384/1332/554                                                                                                        |
| Goodness-of-fit on F <sup>2</sup>           | 1.206                                                                                                                |
| Final R indexes [I ≥ 2σ (I)]                | R <sub>1</sub> = 0.0567, wR <sub>2</sub> = 0.1135                                                                    |
| Final R indexes [all data]                  | R <sub>1</sub> = 0.0699, wR <sub>2</sub> = 0.1179                                                                    |
| Largest diff. peak/hole / e Å <sup>-3</sup> | 1.32/-2.03                                                                                                           |

## Cartesian Coordinates of Optimized Geometries

*Geometries computed at the B3LYP/Def2TZVPP level of theory*

| [(bipy) <sub>2</sub> Ge] <sup>2+</sup><br>E = -3067.411353 |          |          |          | [(bipy) <sub>2</sub> Sn] <sup>2+</sup><br>E = -1204.766271 |          |          |          |
|------------------------------------------------------------|----------|----------|----------|------------------------------------------------------------|----------|----------|----------|
| Ge                                                         | 0        | 0        | -1.09773 | Sn                                                         | 0        | 0        | -1.27441 |
| N                                                          | -0.80637 | -1.30335 | 0.37021  | N                                                          | -0.84331 | -1.42345 | 0.37529  |
| N                                                          | 0.80637  | 1.30335  | 0.37021  | N                                                          | 0.84332  | 1.42345  | 0.37529  |
| N                                                          | 2.11304  | -0.73106 | -0.72786 | N                                                          | -2.25595 | 0.65156  | -0.64837 |
| N                                                          | -2.11303 | 0.73106  | -0.72786 | N                                                          | 2.25595  | -0.65156 | -0.64838 |
| C                                                          | 2.14395  | 1.24258  | 0.59904  | C                                                          | 2.14227  | 1.30526  | 0.74336  |
| C                                                          | 2.88453  | 0.17495  | -0.0999  | C                                                          | -0.09007 | -2.39514 | 0.91393  |
| C                                                          | -2.14395 | -1.24258 | 0.59904  | H                                                          | 0.93781  | -2.44614 | 0.58625  |
| C                                                          | -2.75342 | -2.15271 | 1.45588  | C                                                          | -2.14227 | -1.30526 | 0.74336  |
| H                                                          | -3.81431 | -2.09123 | 1.64568  | C                                                          | -4.28099 | 1.79176  | -1.19682 |
| C                                                          | -0.07456 | -2.25287 | 0.97909  | H                                                          | -4.76993 | 2.59726  | -1.72662 |
| H                                                          | 0.98283  | -2.25579 | 0.76581  | C                                                          | 4.3233   | 0.13428  | 0.22999  |
| C                                                          | -0.629   | -3.18136 | 1.83871  | H                                                          | 4.88144  | 0.85282  | 0.81059  |
| H                                                          | 0.00246  | -3.92373 | 2.306    | C                                                          | -2.90918 | 1.62738  | -1.29157 |
| C                                                          | 0.07456  | 2.25287  | 0.9791   | H                                                          | -2.31176 | 2.293    | -1.90398 |
| H                                                          | -0.98283 | 2.25578  | 0.76581  | C                                                          | 0.57855  | 3.2924   | 1.84548  |
| C                                                          | -2.88453 | -0.17494 | -0.0999  | H                                                          | -0.06865 | 4.0587   | 2.24813  |
| C                                                          | 1.99524  | 3.13088  | 2.08071  | C                                                          | 2.90917  | -1.62738 | -1.29158 |
| H                                                          | 2.46501  | 3.83941  | 2.75015  | H                                                          | 2.31176  | -2.293   | -1.90399 |
| C                                                          | 0.62899  | 3.18136  | 1.83871  | C                                                          | 4.28099  | -1.79176 | -1.19683 |
| H                                                          | -0.00247 | 3.92372  | 2.306    | H                                                          | 4.76993  | -2.59726 | -1.72663 |
| C                                                          | -1.99524 | -3.13088 | 2.08071  | C                                                          | 0.09007  | 2.39514  | 0.91393  |
| H                                                          | -2.46501 | -3.83941 | 2.75015  | H                                                          | -0.93781 | 2.44614  | 0.58625  |
| C                                                          | 4.05191  | -1.86786 | -1.51936 | C                                                          | 2.93931  | 0.23197  | 0.10383  |
| H                                                          | 4.47382  | -2.68372 | -2.08945 | C                                                          | -2.68604 | -2.17415 | 1.68568  |
| C                                                          | 4.27296  | 0.09538  | -0.15768 | H                                                          | -3.71412 | -2.06839 | 1.99602  |
| H                                                          | 4.89479  | 0.83457  | 0.32488  | C                                                          | 2.68604  | 2.17415  | 1.68568  |
| C                                                          | -2.67758 | 1.71717  | -1.43479 | H                                                          | 3.71412  | 2.06839  | 1.99602  |
| H                                                          | -2.006   | 2.39722  | -1.94536 | C                                                          | -2.93931 | -0.23198 | 0.10383  |
| C                                                          | 2.75342  | 2.15271  | 1.45588  | C                                                          | 4.99731  | -0.8901  | -0.42113 |
| H                                                          | 3.81431  | 2.09123  | 1.64568  | H                                                          | 6.0724   | -0.97352 | -0.33147 |
| C                                                          | 2.67758  | -1.71717 | -1.43479 | C                                                          | 1.90342  | 3.17536  | 2.24067  |
| H                                                          | 2.006    | -2.39722 | -1.94536 | H                                                          | 2.32462  | 3.85198  | 2.97252  |
| C                                                          | -4.27296 | -0.09538 | -0.15768 | C                                                          | -4.99731 | 0.8901   | -0.42113 |
| H                                                          | -4.89479 | -0.83456 | 0.32489  | H                                                          | -6.0724  | 0.97351  | -0.33147 |
| C                                                          | -4.0519  | 1.86786  | -1.51937 | C                                                          | -0.57855 | -3.29239 | 1.84548  |
| H                                                          | -4.47382 | 2.68372  | -2.08945 | H                                                          | 0.06865  | -4.0587  | 2.24813  |

|   |          |          |          |
|---|----------|----------|----------|
| C | -4.8597  | 0.94284  | -0.86926 |
| H | -5.93754 | 1.01973  | -0.9252  |
| C | 4.85971  | -0.94284 | -0.86926 |
| H | 5.93754  | -1.01972 | -0.9252  |

|   |          |          |         |
|---|----------|----------|---------|
| C | -4.3233  | -0.13428 | 0.22998 |
| H | -4.88144 | -0.85283 | 0.81059 |
| C | -1.90341 | -3.17536 | 2.24067 |
| H | -2.32462 | -3.85198 | 2.97252 |

**E = -3032.554006**

|    |          |          |          |
|----|----------|----------|----------|
| Ge | 0        | -1.59209 | -0.69704 |
| Cl | 0.00001  | -2.34161 | 1.39029  |
| N  | -1.30299 | 0.01573  | -0.27102 |
| N  | 1.30299  | 0.01574  | -0.27102 |
| C  | -2.63232 | -0.12135 | -0.29424 |
| H  | -3.01641 | -1.10902 | -0.51589 |
| C  | -3.4761  | 0.94597  | -0.04051 |
| H  | -4.54698 | 0.80283  | -0.05952 |
| C  | -2.91274 | 2.18518  | 0.23448  |
| H  | -3.54309 | 3.04135  | 0.43462  |
| C  | -1.5311  | 2.32167  | 0.2528   |
| H  | -1.08407 | 3.28112  | 0.46615  |
| C  | -0.73709 | 1.21028  | -0.00137 |
| C  | 0.73708  | 1.21028  | -0.00137 |
| C  | 1.53109  | 2.32168  | 0.2528   |
| H  | 1.08405  | 3.28113  | 0.46615  |
| C  | 2.91273  | 2.1852   | 0.23448  |
| H  | 3.54307  | 3.04136  | 0.43463  |
| C  | 3.4761   | 0.94599  | -0.04052 |
| H  | 4.54698  | 0.80285  | -0.05952 |
| C  | 2.63231  | -0.12134 | -0.29424 |
| H  | 3.01642  | -1.10901 | -0.51589 |

## References

1. SAINT. Version 7.60A. Bruker AXS Inc., Madison, Wisconsin, USA (1997-2003).
2. SADABS- 2008/1. Bruker AXS area detector scaling and adsorption correction, Bruker AXS Inc., Madison, Wisconsin, USA (2003).
3. G. M. Sheldrick, *Acta Crystallogr., Sect. A: Found. Adv.*, 2015, **A71**, 3–8.
4. G. M. Sheldrick, *Acta Crystallogr. A* 2008, **64**, 112-122.

5. O. V. Dolomanov, L. J. Bourhis, R. J. Gildea, J. A. K. Howard, H. Puschmann, *J. Appl. Crystallogr.* 2009, **42**, 339–341.
6. Gaussian 09, Revision E.01, M. J. Frisch, G. W. Trucks, H. B. Schlegel, G. E. Scuseria, M. A. Robb, J. R. Cheeseman, G. Scalmani, V. Barone, B. Mennucci, G. A. Petersson, H. Nakatsuji, M. Caricato, X. Li, H. P. Hratchian, A. F. Izmaylov, J. Bloino, G. Zheng, J. L. Sonnenberg, M. Hada, M. Ehara, K. Toyota, R. Fukuda, J. Hasegawa, M. Ishida, T. Nakajima, Y. Honda, O. Kitao, H. Nakai, T. Vreven, J. A. Montgomery, Jr., J. E. Peralta, F. Ogliaro, M. Bearpark, J. J. Heyd, E. Brothers, K. N. Kudin, V. N. Staroverov, R. Kobayashi, J. Normand, K. Raghavachari, A. Rendell, J. C. Burant, S. S. Iyengar, J. Tomasi, M. Cossi, N. Rega, J. M. Millam, M. Klene, J. E. Knox, J. B. Cross, V. Bakken, C. Adamo, J. Jaramillo, R. Gomperts, R. E. Stratmann, O. Yazyev, A. J. Austin, R. Cammi, C. Pomelli, J. W. Ochterski, R. L. Martin, K. Morokuma, V. G. Zakrzewski, G. A. Voth, P. Salvador, J. J. Dannenberg, S. Dapprich, A. D. Daniels, Ö. Farkas, J. B. Foresman, J. V. Ortiz, J. Cioslowski, and D. J. Fox, Gaussian, Inc., Wallingford CT, 2016.
